# Supplementary material
Source: PubMed Central journal article supplement (PMC3393454)
Supplement: supp_56.7.3690_TableS1-S3.pdf [file supp_56.7.3690_TableS1-S3.pdf]

Supplemental Material for: Evaluation of Arylimidamides DB1955 and DB1960 as Candidates against Visceral Leishmaniasis and Chagas Disease – In Vivo Efficacy, Acute Toxicity, Pharmacokinetics and Toxicology Studies

Xiaohua Zhu<sup>1</sup>, Qiang Liu<sup>2</sup>, Sihyung Yang<sup>2,#</sup>, Toufan Parman<sup>3</sup>, Carol E. Green<sup>3</sup>, Jon C. Mirsalis<sup>3</sup>, Maria de Nazaré Correia Soeiro<sup>4</sup>, Elen Mello de Souza<sup>4</sup>, Cristiane França da Silva<sup>4</sup>, Denise da Gama Jaen Batista<sup>4</sup>, Chad E. Stephens<sup>5</sup>, Moloy Banerjee<sup>6</sup>, Abdelbasset A. Farahat<sup>6,7</sup>, Manoj Munde<sup>6</sup>, W. David Wilson<sup>6</sup>, David W. Boykin<sup>6</sup>, Michael Zhuo Wang<sup>2,#</sup>, and Karl A. Werbovetz<sup>1,\*</sup>

<sup>1</sup>Division of Medicinal Chemistry and Pharmacognosy, College of Pharmacy, The Ohio State University, Columbus, OH 43210, USA, <sup>2</sup>Eshelman School of Pharmacy, The University of North Carolina at Chapel Hill, Chapel Hill, NC 27599, USA, <sup>3</sup>SRI International, Menlo Park, California, USA, <sup>4</sup>Laboratório de Biologia Celular, Instituto Oswaldo Cruz/Fundação Oswaldo Cruz, Rio de Janeiro, Brazil, <sup>5</sup>Department of Chemistry and Physics, Augusta State University, Augusta, GA, USA, <sup>6</sup>Department of Chemistry, Georgia State University, Atlanta, GA 30302, USA, <sup>7</sup>Department of Pharmaceutical Organic Chemistry, Faculty of Pharmacy, Mansoura University, Mansoura, 35516, Egypt

\*To whom correspondence should be addressed: 332 Parks Hall, 500 West 12<sup>th</sup> Avenue, The Ohio State University, OH 43210; Phone: (614) 292-5499; Fax: (614) 292-2435; E-mail: werbovetz.1@osu.edu

#Present address: Department of Pharmaceutical Chemistry, The University of Kansas, Lawrence, KS 66047, USA

### Preparation and characterization of DB1955 and DB1960

**2,5-Bis[2-cyclopentyloxy-4-(2-pyridylimino)aminophenyl]-furan methanesulfonate (DB 1955).** The free base of DB1852 (1) (1.06 g, 1.7 mmol) was suspended in dry dichloromethane (40 mL) and cooled to 0 °C in an ice bath. Freshly distilled methanesulfonic acid (0.36 mL, 3.74 mmol) was added to the suspension and the mixture was stirred at room temperature for 0.5 h. The resulting red solution was concentrated under reduced pressure. The red crude solid was crystallized from dry dichloromethane and dry ether and filtered to give a red orange solid. Yield: 0.9 g (61%), mp > 300 °C dec. <sup>1</sup>H NMR (DMSO-*d*<sub>6</sub>): δ 11.90 (s, 2H), 10.06 (s, 2H), 9.34 (s, 2H), 8.93 (s, 2H), 8.38 (d, *J* = 7.2 Hz, 2H), 8.27 (d, *J* = 7.2 Hz, 2H), 8.17 (d, *J* = 7.2 Hz, 2H), 7.88 (br s, 2H), 7.30 (s, 2H), 7.17-7.15 (m, 4H), 5.06 (s, 2H), 2.31 (s, 6H), 2.02-1.98 (m, 8H), 1.81 (br s, 2H), 1.69 (br s, 2H). <sup>13</sup>C NMR (DMSO-*d*<sub>6</sub>): δ 159.9, 154.6, 150.3, 148.5, 144.9, 138.8, 134.6, 129.0, 127.0, 124.4, 119.4, 118.1, 113.3, 111.5, 80.4, 38, 32.7, 24.1; ESI-MS: *m/z* calcd. for C<sub>38</sub>H<sub>38</sub>N<sub>6</sub>O<sub>3</sub>: 626.74; found: 627.20 (base M<sup>+</sup> +1). Analysis calcd. for C<sub>38</sub>H<sub>38</sub>N<sub>6</sub>O<sub>3</sub>·2.0 CH<sub>3</sub>SO<sub>3</sub>H· 2.75 H<sub>2</sub>O: C, 55.32; H, 5.98; N, 9.68; found: C, 55.08; H, 6.09; N, 9.52.

### **2,5-Bis[2-*i*-propyloxy-4-(2-pyridylimino)aminophenyl]-furan methanesulfonate (DB 1960).**

To a suspension of the free base of DB766 (2) (4.85 g, 8.45 mmol) in EtOH (60 mL) was added methanesulfonic acid (1.64 g, 17.1 mmol) and the mixture was stirred briefly to yield a clear solution. The solution was then treated with a large volume of diethyl ether to precipitate the dimesylate salt as a yellow solid, which was filtered and dried in vacuum. Yield: 6.07 g (94%), mp 245-250 °C dec. <sup>1</sup>H NMR (DMSO-*d*<sub>6</sub>): 11.70 (br s, 2H), 10.3 (br s, 2H), 9.32 (br s, 2H), 8.90 (m, 2H), 8.35 (d, *J* = 8.0 Hz, 2H), 8.25 (t, 2H), 8.14 (d, *J* = 8.3 Hz, 2H), 7.84-7.88 (m, 2H), 7.31 (d, *J* = 1.2 Hz, 2H), 7.19 (s, 2H), 7.14 (dd, *J* = 8.4, 1.5 Hz, 2H), 4.83 (m, 2H), 2.29 (s, 6H), 1.42

(d, 12H).  $^{13}\text{C}$  NMR (DMSO- $d_6$ ): 159.0, 153.5, 149.3, 147.6, 144.0, 137.9, 133.7, 128.0, 126.0, 123.4, 118.7, 117.2, 112.6, 110.7, 70.0, 21.8, 21.4. ESI-MS:  $m/z$  calculated for  $\text{C}_{34}\text{H}_{34}\text{N}_6\text{O}_3$ : 574.67; found: 575.27 (base  $\text{M}^+ + 1$ ). Analysis calcd for  $\text{C}_{34}\text{H}_{34}\text{N}_6\text{O}_3 \cdot 2\text{CH}_3\text{SO}_3\text{H} \cdot 1.0 \text{H}_2\text{O}$  : C, 55.09; H, 5.65; N, 10.71. Found: C, 55.39; H, 5.59; N, 10.54.

Table S1. Five-day repeat dose study design

| Group | Treatment | Dose<br>(mg/kg) | Dose conc.<br>(mg/ml) | Volume<br>(ml/kg) | No. of animals              |                                  |                                             |
|-------|-----------|-----------------|-----------------------|-------------------|-----------------------------|----------------------------------|---------------------------------------------|
|       |           |                 |                       |                   | Main<br>necropsy<br>(day 6) | Recovery<br>necropsy<br>(day 12) | Toxicokinetic<br>satellite<br>(day 1 and 5) |
| 1     | Vehicle   | 0               | 0                     | 10                | 5                           | 3                                | 0                                           |
| 2     | DB1955    | 100             | 10                    | 10                | 5                           | 3                                | 15                                          |
| 3     | DB1955    | 200             | 20                    | 10                | 5                           | 3                                | 15                                          |
| 4     | DB1955    | 500             | 50                    | 10                | 5                           | 3                                | 15                                          |
| 5     | DB1960    | 100             | 10                    | 10                | 5                           | 3                                | 15                                          |
| 6     | DB1960    | 200             | 20                    | 10                | 5                           | 3                                | 15                                          |
| 7     | DB1960    | 500             | 50                    | 10                | 5                           | 3                                | 15                                          |

Table S2. Summary of body weight by treatment group (in grams)

| Drug    | Dose<br>(mg/kg/day) | Study Day | Body weight |                 |       |
|---------|---------------------|-----------|-------------|-----------------|-------|
|         |                     |           | N           | Mean            | SD    |
| Vehicle | 0                   | 1         | 8           | 18.44           | 0.498 |
|         |                     | 6         | 8           | 18.56           | 0.55  |
|         |                     | 12        | 3           | 19.17           | 0.473 |
| DB1955  | 100                 | 1         | 8           | 18.06           | 0.787 |
|         |                     | 6         | 8           | 17.63           | 0.349 |
|         |                     | 12        | 3           | 18.63           | 0.577 |
|         | 200                 | 1         | 8           | 18.93           | 0.972 |
|         |                     | 6         | 8           | 18.83           | 1.096 |
|         |                     | 12        | 3           | 19.07           | 1.25  |
|         | 500                 | 1         | 8           | 17.75           | 0.661 |
|         |                     | 6         | 8           | 17.99           | 0.948 |
|         |                     | 12        | 3           | 16.53*          | 1.155 |
| DB1960  | 100                 | 1         | 8           | 17.94           | 0.765 |
|         |                     | 6         | 8           | 17.86           | 0.682 |
|         |                     | 12        | 3           | 18.97           | 0.503 |
|         | 200                 | 1         | 8           | 17.85           | 1.768 |
|         |                     | 6         | 8           | 17.4            | 1.865 |
|         |                     | 12        | 3           | 20              | 1.48  |
|         | 500                 | 1         | 8           | 18.16           | 0.585 |
|         |                     | 6         | 8           | 14.65**         | 1.042 |
|         |                     | 12        | 3           | NA <sup>a</sup> | NA    |

<sup>a</sup> NA: value not available since animals in this group were euthanized in moribund condition earlier in the study.

\*  $p < 0.05$ , compared with vehicle control; \*\*  $p < 0.01$ , compared with vehicle control

Table S3. Toxicokinetic parameters for DB1955 and DB1960 after oral administration in female BALB/c mice

| Drug   | Dose Level<br>(mg/kg) | Study Day | C <sub>max</sub><br>(µg/ml) | T <sub>max</sub><br>(h) | AUC <sub>0 to 6 hr</sub><br>(h·µg/ml) | AUC <sub>0 to 24 hr</sub><br>(h·µg/ml) | t <sub>1/2</sub><br>(h) |
|--------|-----------------------|-----------|-----------------------------|-------------------------|---------------------------------------|----------------------------------------|-------------------------|
| DB1955 | 100                   | 1         | 2.03 ± 0.23                 | 1                       | 6.94 ± 0.64                           | NA <sup>a</sup>                        | NA                      |
|        |                       | 5         | 1.24 ± 0.23                 | 4                       | 5.94 ± 1.15                           | NA                                     | NA                      |
|        | 200                   | 1         | 2.32 ± 0.31                 | 1                       | 9.05 ± 1.06                           | NA                                     | NA                      |
|        |                       | 5         | 2.67 ± 1.00                 | 6                       | 10.27 ± 1.30                          | NA                                     | NA                      |
|        | 500                   | 1         | 4.42 ± 1.10                 | 1                       | 17.92 ± 3.22                          | NA                                     | NA                      |
|        |                       | 5         | 4.41 ± 0.17                 | 1                       | 17.37 ± 1.71                          | 36.81 ± 6.67                           | 6.1                     |
| DB1960 | 100                   | 1         | 2.94 ± 0.62                 | 0.5                     | 9.52 ± 0.58                           | NA                                     | NA                      |
|        |                       | 5         | 2.20 ± 0.23                 | 0.5                     | 8.69 ± 0.62                           | 27.75 ± 1.51                           | 18.4                    |
|        | 200                   | 1         | 3.13 ± 0.09                 | 1                       | 14.23 ± 0.32                          | NA                                     | NA                      |
|        |                       | 5         | 2.95 ± 0.87                 | 0.5                     | 13.17 ± 1.57                          | 52.08 ± 2.48                           | 31.3                    |
|        | 500                   | 1         | 4.36 ± 0.44                 | 1                       | 21.55 ± 1.77                          | NA                                     | NA                      |
|        |                       | 5         | 5.19 ± 1.24                 | 1                       | 27.09 ± 2.49                          | 99.15 ± 9.31                           | 29.5                    |

<sup>a</sup> NA: value not available because there were insufficient data points to calculate this parameter

## References

1. **Akay, S.** 2009. Ph.D. thesis. Diagnosis and inhibition tools in medicinal chemistry. Georgia State University, Atlanta, GA.
2. **Wang, M., X. Zhu, A. Srivastava, Q. Liu, J. Sweat, T. Pandharkar, C. Stephens, E. Riccio, S. Mandal, R. Madhubala, R. Tidwell, W. Wilson, D. Boykin, J. Hall, D. Kyle, and K. Werbovetz.** 2010. Novel arylimidamides for the treatment of visceral leishmaniasis. *Antimicrob. Agents Chemother.* **54**:2507-2516.
